# Supplementary material
Source: PubMed Central journal article supplement (PMC8366520)

Supplemental Figure 1. Mini Mental State Examination Change Scores by Reported Days of Exposure to an Anticholinergic Drug

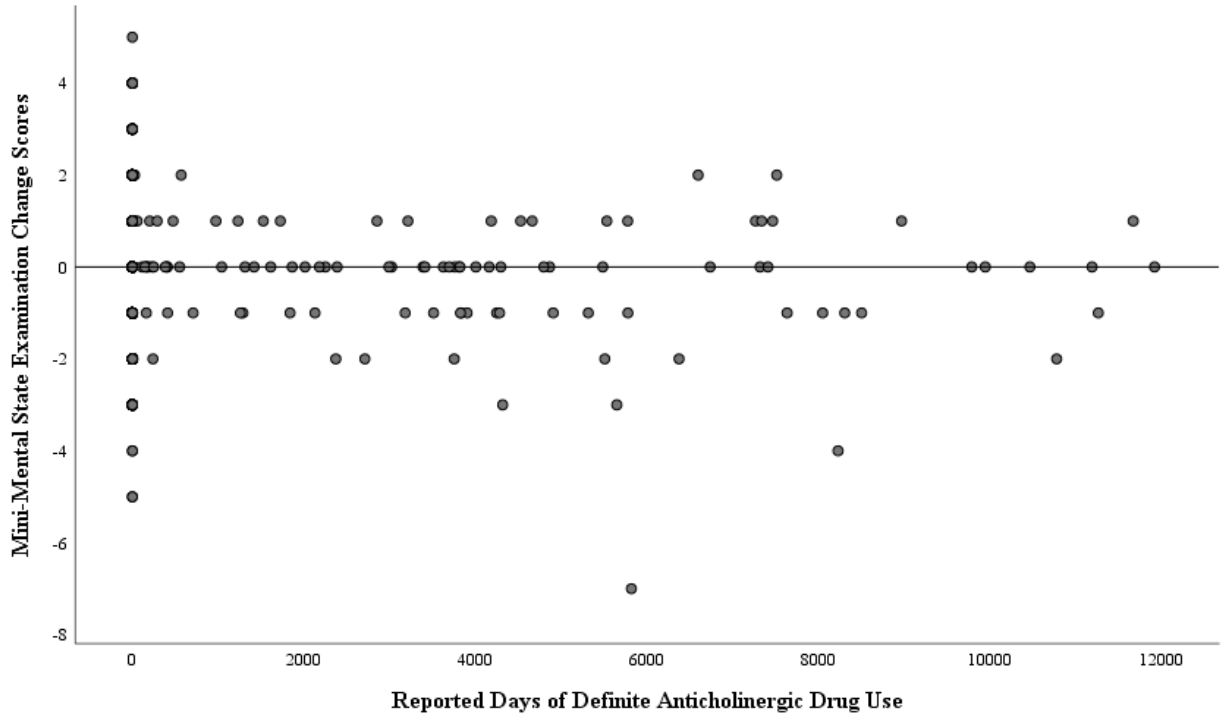

Supplement: NIHMS1727713-supplement-Supplemental_Material_1.pdf [file NIHMS1727713-supplement-Supplemental_Material_1.pdf]
