# Supplementary material
Source: PubMed Central journal article supplement (PMC8366520)

Supplemental Figure 2. Auditory Verbal Learning Test, Immediate Recall Change Scores by Reported Days of Exposure to an Anticholinergic Drug

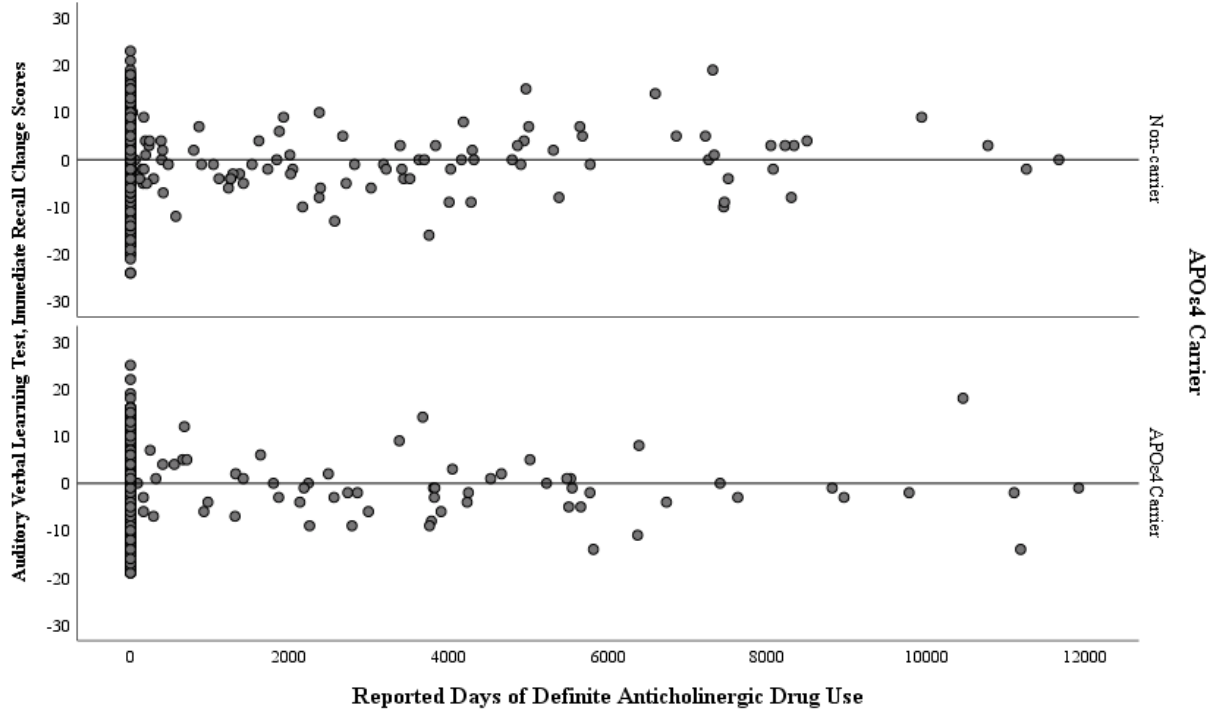

Supplement: NIHMS1727713-supplement-Supplemental_Material_2.pdf [file NIHMS1727713-supplement-Supplemental_Material_2.pdf]
