# Supplementary material
Source: PubMed Central journal article supplement (PMC8366520)
Supplement: NIHMS1727713-supplement-Supplemental_Material_3.pdf [file NIHMS1727713-supplement-Supplemental_Material_3.pdf]

Supplemental Figure 3. Auditory Verbal Learning Test, Delayed Recall Change Scores by Reported Days of Exposure to an Anticholinergic Drug
