# Supplementary material
Source: PubMed Central journal article supplement (PMC8366520)

Supplemental Figure 4. Trail Making Test, Part A, Change Scores by Reported Days of Exposure to an Anticholinergic Drug

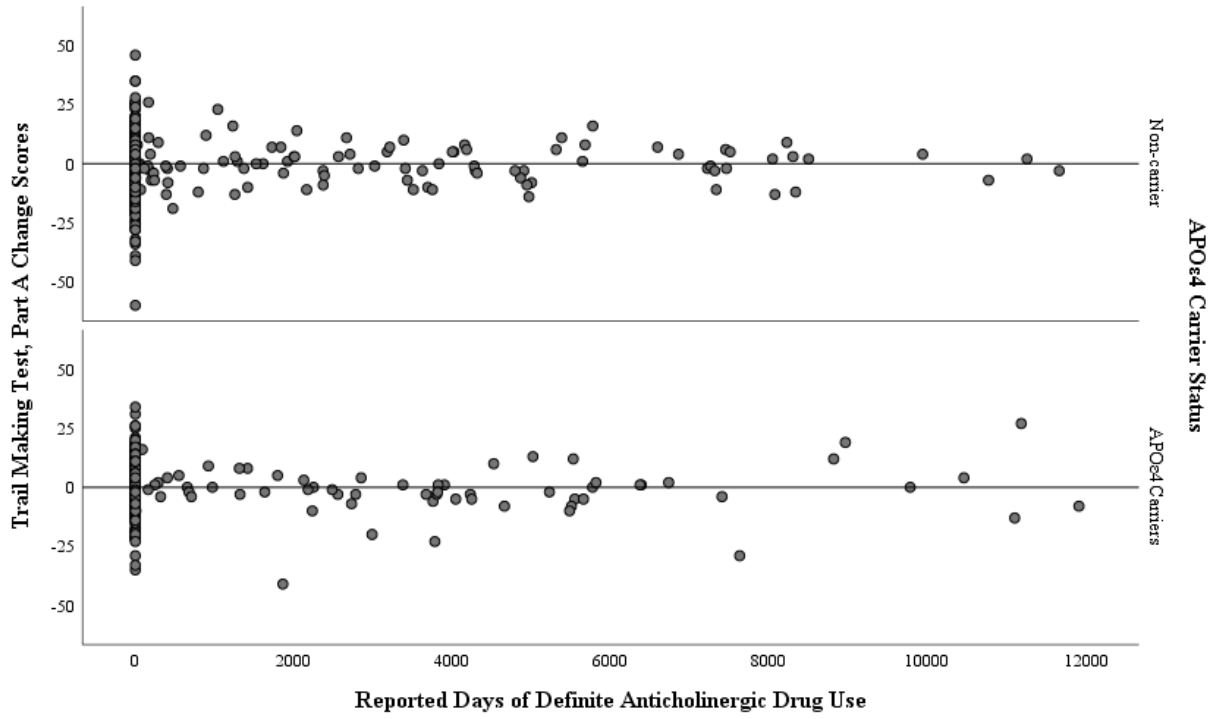

Supplement: NIHMS1727713-supplement-Supplemental_Material_4.pdf [file NIHMS1727713-supplement-Supplemental_Material_4.pdf]
