# Supplementary material
Source: PubMed Central journal article supplement (PMC8366520)

Supplemental Figure 5. Trail Making Test, Part B Change Scores by Reported Days of Exposure to an Anticholinergic Drug

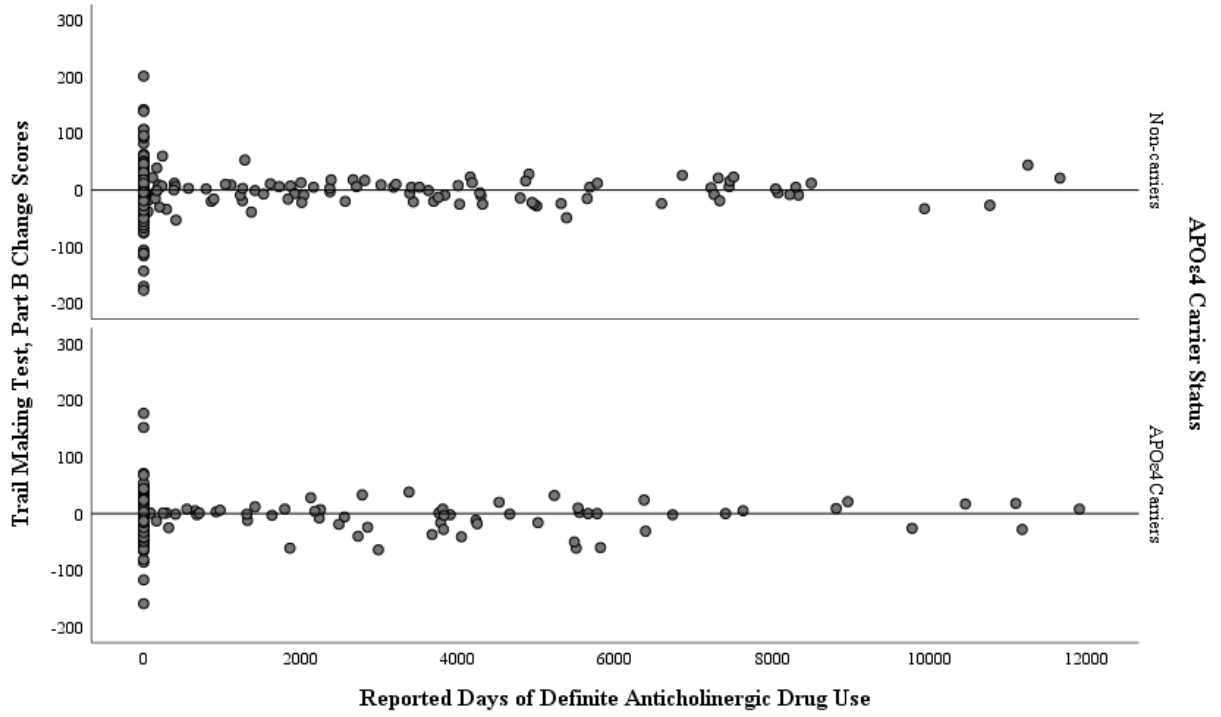

Supplement: NIHMS1727713-supplement-Supplemental_Material_5.pdf [file NIHMS1727713-supplement-Supplemental_Material_5.pdf]
