# Supplementary material
Source: PubMed Central journal article supplement (PMC8366520)

Supplemental Figure 6. Model Predicted Mean and 95% Confidence Interval Change in Auditory Verbal Learning Test, Delay Scores by APO $\epsilon$ 4 Carrier Status, Anticholinergic Drug Use and Visit

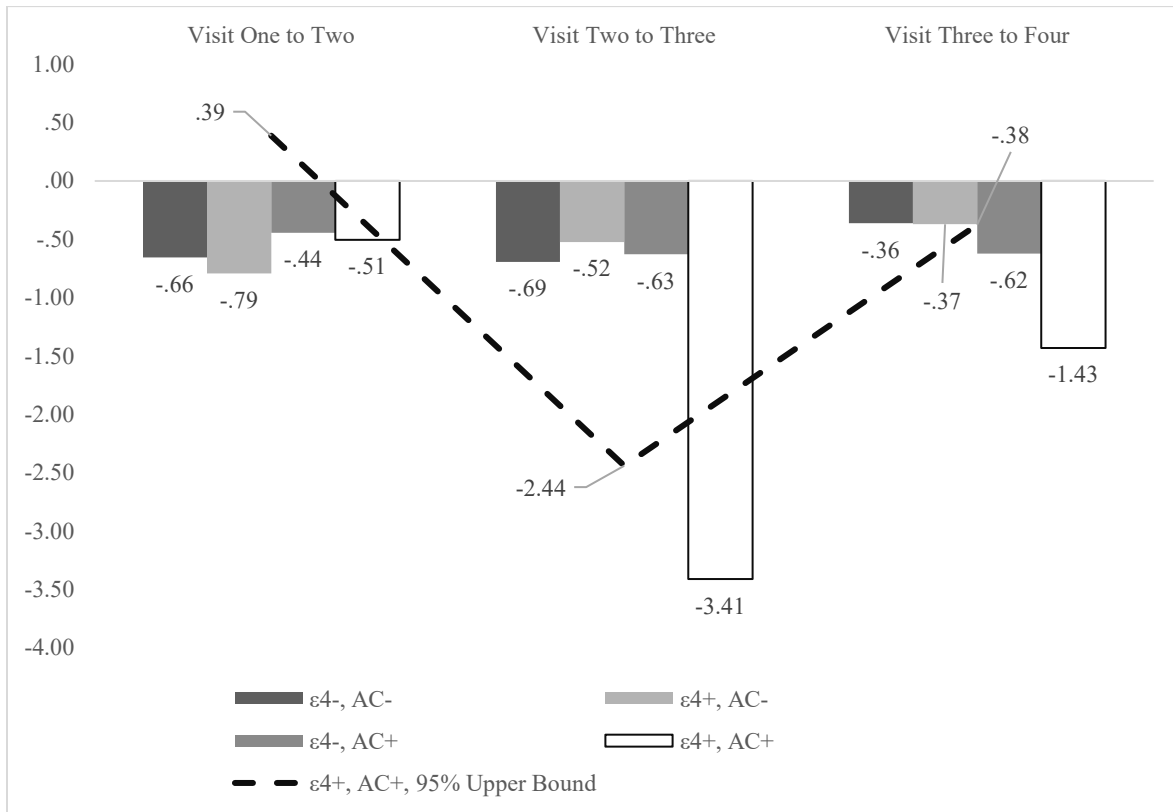

Supplement: NIHMS1727713-supplement-Supplemental_Material_6.pdf [file NIHMS1727713-supplement-Supplemental_Material_6.pdf]
