# Supplementary material
Source: PubMed Central journal article supplement (PMC8366520)
Supplement: NIHMS1727713-supplement-Supplemental_Material_7.pdf [file NIHMS1727713-supplement-Supplemental_Material_7.pdf]

Supplemental Table 1. Model One Predicted Means and 95% Confidence Interval Neuropsychological Assessment Scores by Anticholinergic Drug Use<sup>1</sup> and Visit

| Test <sup>2</sup> | Visit <sup>3</sup> | One              |       | Two   |       | Three |       | Four  |       | Total |       |
|-------------------|--------------------|------------------|-------|-------|-------|-------|-------|-------|-------|-------|-------|
|                   | Stat <sup>4</sup>  | AC-              | AC+   | AC-   | AC+   | AC-   | AC+   | AC-   | AC+   | AC-   | AC+   |
| MMSE              | $\bar{X}$          | Not Administered |       | 29.20 | 29.26 | 29.23 | 29.23 | 29.33 | 28.87 | 29.25 | 29.12 |
|                   | L                  | Not Administered |       | 29.00 | 28.96 | 29.03 | 28.95 | 29.12 | 28.57 | 29.06 | 28.89 |
|                   | H                  | Not Administered |       | 29.39 | 29.55 | 29.43 | 29.51 | 29.53 | 29.18 | 29.44 | 29.35 |
| DS                | $\bar{X}$          | 17.39            | 17.90 | 17.86 | 18.57 | 18.28 | 17.96 | 18.42 | 18.16 | 17.99 | 18.15 |
|                   | L                  | 16.84            | 16.88 | 17.31 | 17.49 | 17.68 | 16.81 | 17.77 | 16.59 | 17.46 | 17.40 |
|                   | H                  | 17.94            | 18.92 | 18.42 | 19.65 | 18.88 | 19.10 | 19.07 | 19.72 | 18.52 | 18.89 |
| COWA              | $\bar{X}$          | 43.89            | 45.51 | 45.98 | 46.19 | 47.55 | 48.48 | 48.95 | 48.72 | 46.59 | 47.23 |
|                   | L                  | 42.38            | 42.72 | 44.46 | 43.21 | 45.90 | 45.38 | 47.08 | 43.89 | 45.13 | 45.11 |
|                   | H                  | 45.39            | 48.30 | 47.50 | 49.18 | 49.20 | 51.58 | 50.82 | 53.54 | 48.05 | 49.34 |
| AVLTI             | $\bar{X}$          | 48.20            | 47.46 | 49.65 | 49.90 | 51.20 | 48.54 | 51.69 | 47.83 | 50.18 | 48.43 |
|                   | L                  | 47.12            | 45.46 | 48.55 | 47.71 | 50.01 | 46.32 | 50.39 | 44.66 | 49.14 | 46.95 |
|                   | H                  | 49.28            | 49.45 | 50.75 | 52.10 | 52.38 | 50.76 | 52.99 | 51.01 | 51.23 | 49.92 |
| AVLTD             | $\bar{X}$          | 9.63             | 9.17  | 10.09 | 9.75  | 10.38 | 9.09  | 10.71 | 9.03  | 10.20 | 9.26  |
|                   | L                  | 9.23             | 8.43  | 9.68  | 8.95  | 9.95  | 8.26  | 10.23 | 7.90  | 9.82  | 8.72  |
|                   | H                  | 10.02            | 9.90  | 10.49 | 10.54 | 10.82 | 9.92  | 11.18 | 10.16 | 10.58 | 9.80  |
| TMTA              | $\bar{X}$          | 29.01            | 28.79 | 26.55 | 28.79 | 25.31 | 28.04 | 24.74 | 27.70 | 26.40 | 28.33 |
|                   | L                  | 27.83            | 26.61 | 25.33 | 26.32 | 24.02 | 25.68 | 23.34 | 24.42 | 25.26 | 26.73 |
|                   | H                  | 30.20            | 30.98 | 27.76 | 31.26 | 26.60 | 30.40 | 26.14 | 30.99 | 27.55 | 29.93 |
| TMTB              | $\bar{X}$          | 72.72            | 69.88 | 62.74 | 67.96 | 61.13 | 71.80 | 60.57 | 73.10 | 64.29 | 70.69 |
|                   | L                  | 69.30            | 63.00 | 59.45 | 61.84 | 57.53 | 65.30 | 56.60 | 63.49 | 61.08 | 66.16 |
|                   | H                  | 76.13            | 76.76 | 66.03 | 74.09 | 64.72 | 78.30 | 64.54 | 82.71 | 67.50 | 75.21 |

<sup>1</sup> AC-=non-user and AC+=anticholinergic drug user

<sup>2</sup> MMSE=Mini-Mental State Examination, DS=Digit Span subtest from the Wechsler Adult Intelligence Scale-Third Edition, COWA=Benton Controlled Oral Word Association test, AVLTI=Total number of words recalled from the first five trials or Rey's Auditory Verbal Learning Test, AVLTD=the total number of words recalled after the delayed period on Rey's Auditory Verbal Learning Test, TMTA=Trail Making Test, Part A, TMTB=Trail Making Test, Part B.

<sup>3</sup> Data collection process started in 2001 for visit one, 2006 for visit two, 2009 for visit three, and 2012 for visit four. As highlighted, MMSE was not administered during the first visit.

<sup>4</sup>  $\bar{X}$ =Linear Mixed Model Predicted Mean, L=Lower Bound 95% Confidence Interval, H=Upper Bound 95% Confidence Interval
